# Supplementary material
Source: Springer Nature journal article supplement (https://www.springermedizin.de/resource/supplementary/12911_2012_640_MOESM3_ESM.pdf/9526308)
Supplement: MOESM3 [file 9526308]

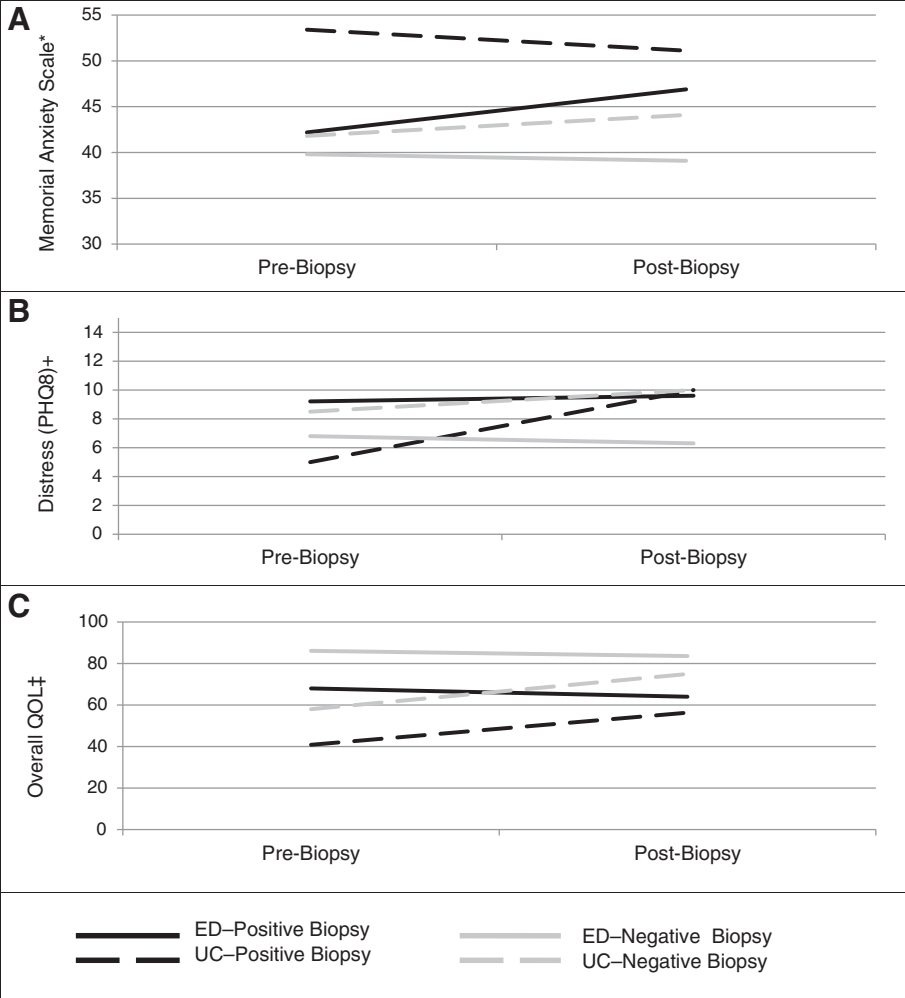

\* (A) MAX-PC: higher = more anxiety  
 +(B) PHQ8: higher = more distress/depressive symptoms  
 ±(C) General QOL: lower = worse quality of life
